# Supplementary material
Source: Royal Society of Chemistry journal article supplement (doi:10.1039/d6ay00456c)
Supplement: d6ay00456c1.pdf [file d6ay00456c1.pdf]

ARTICLE

## Digital image method based on smartphone assisted by hydrophobic natural deep eutectic solvent for Iron quantification in dietary supplements

Gabriel Bercley de Lima Vitorino<sup>a</sup>, Jackson Rodrigo Silva<sup>a</sup>, Vinícius A. Carvalho<sup>a</sup>, João Paulo de Almeida<sup>a</sup>, William Toito Suarez<sup>b</sup>, Severino Carlos Oliveira<sup>c</sup> and Vagner Bezerra dos Santos<sup>a,\*</sup>

<sup>a</sup>LIA<sup>3</sup> - Applied Analytical Instrumentation Laboratory, Department of Fundamental Chemistry, Federal University of Pernambuco, Recife, 50740-560, PE, Brazil (Av. Jornalista Anibal Fernandes, S/N, Cidade Universitária)

<sup>b</sup>Department of Chemistry, Federal University of Viçosa, Viçosa, 36570-000, MG, Brazil (Av. Peter Henry Rolfs S/N)

<sup>c</sup>Department of Chemistry, Federal Rural University of Pernambuco, Recife, 52171-900, PE, Brazil (Dom Manuel de Medeiros, S/N, Dois Irmãos)

\*Corresponding author:

vagner.bsantos@ufpe.br / Recife, 50740-560, PE, Brazil (Av. Jornalista Anibal Fernandes, S/N, Cidade Universitária)

### Supplementary Information

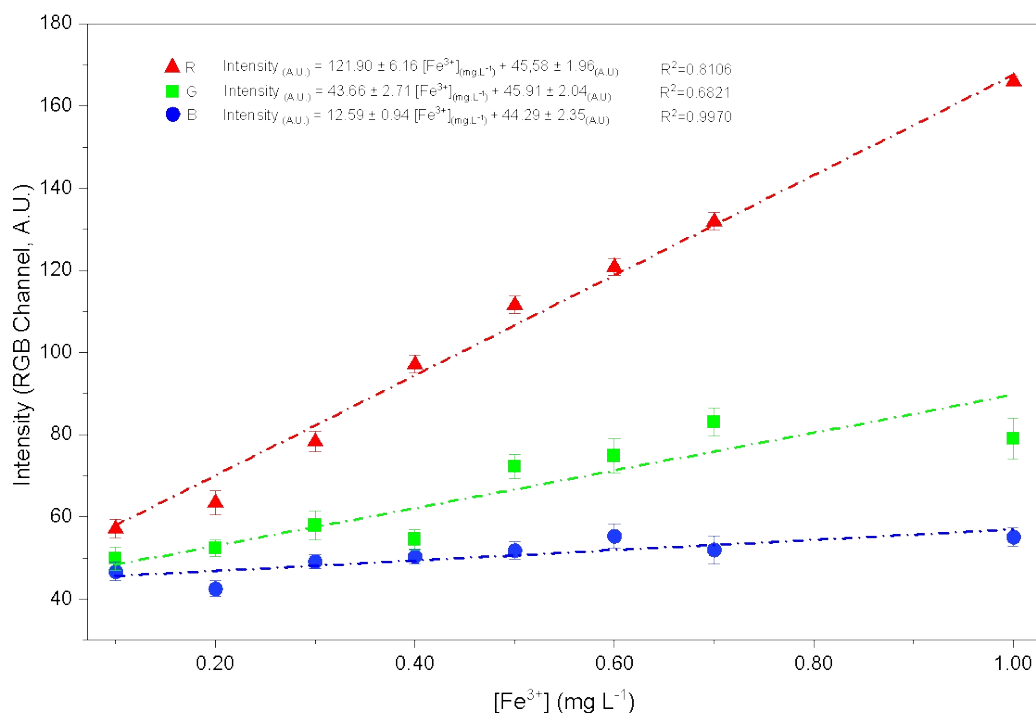

**Figure S1.** Analytical curves for the red (R), green (G), and blue (B) channels using the DIB method for quantification determination of  $Fe^{3+}$ . The red channel presented superior sensitivity and linearity compared with the green and blue channels.

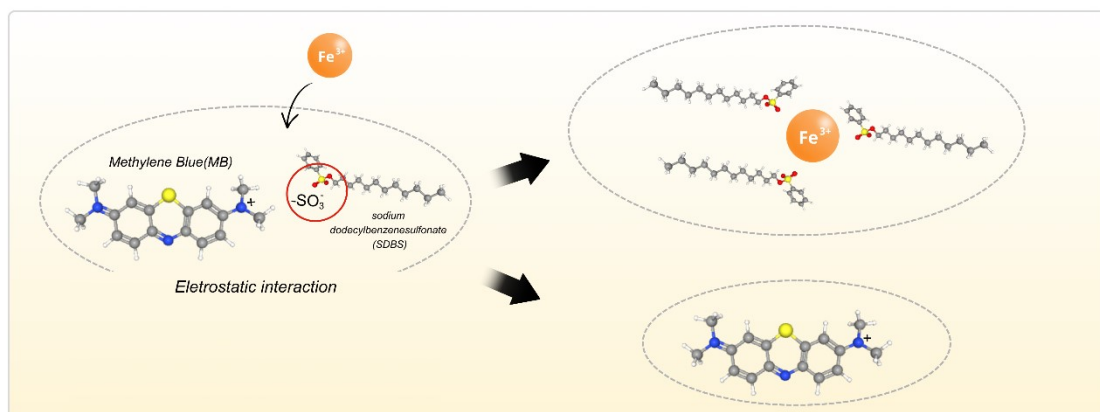

**Figure S2.** Schematic illustration of the supramolecular interactions involved in the SDBS-MB colorimetric reagent assisted by NADES. In the absence of iron, methylene blue ( $MB^+$ ) is moved to aqueous medium, and the iron react with SDBS to form a neutral complex that moved to NADES phase.

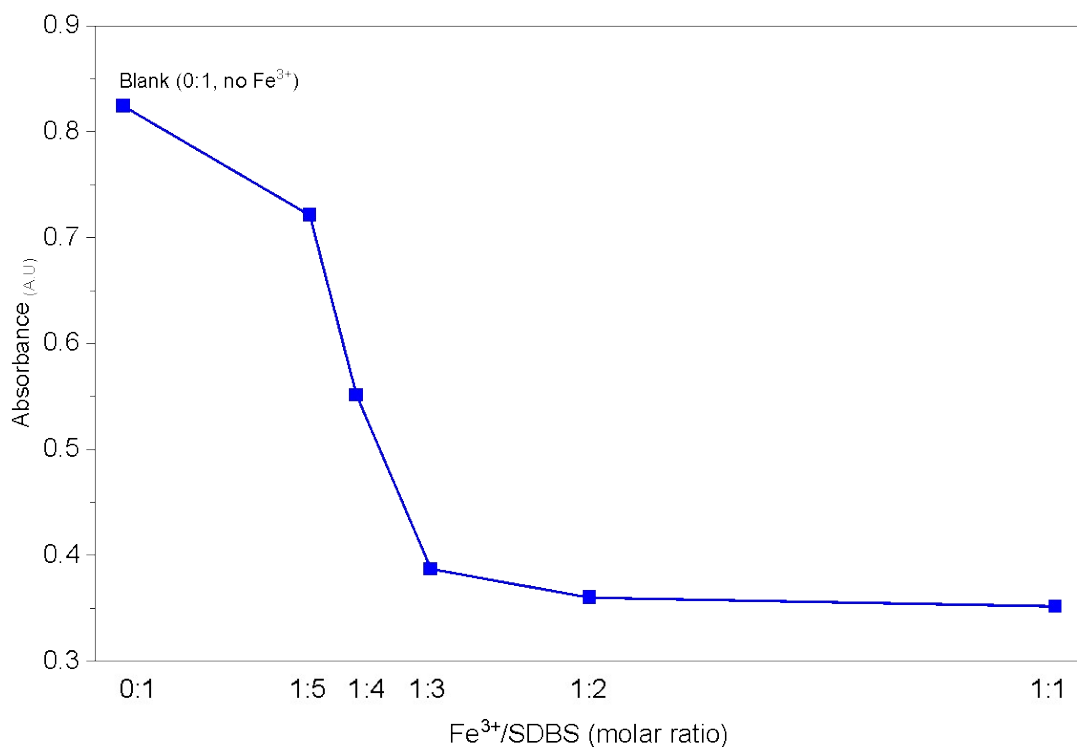

**Figure S3.** Stoichiometric study to find the molar ratio from the Iron: SDBS complex for UV-Vis spectrophotometry. The data lead to the Fe (SDBS)<sub>3</sub> product.

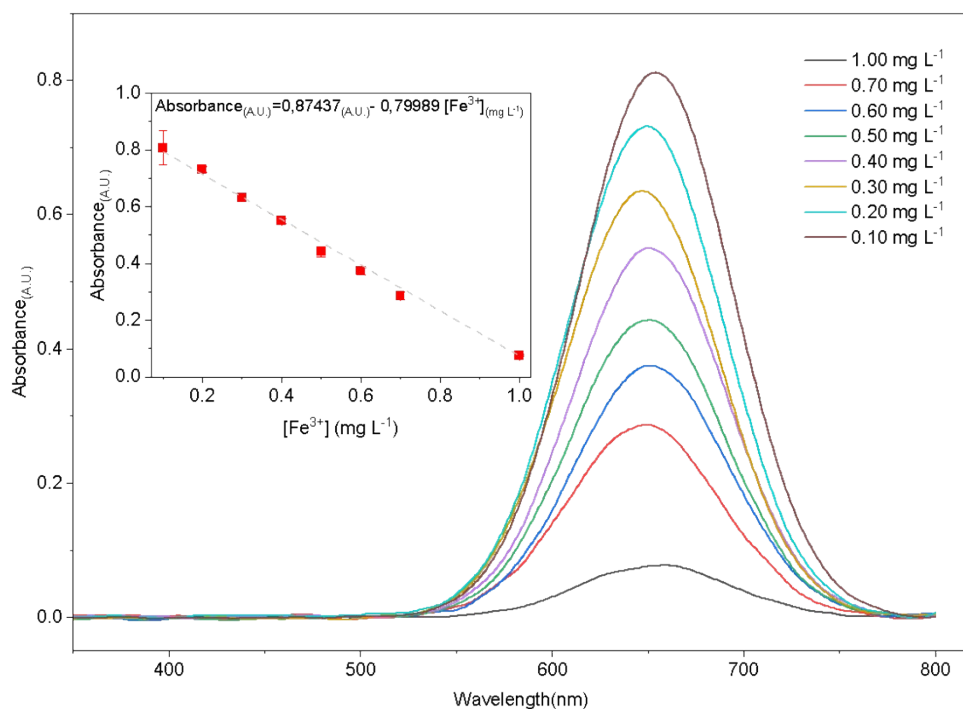

**Figure S4.** UV-Vis spectra and analytical curve obtained using UV-Vis spectrophotometric method and DCM-NADES/SDBS-MB system. The absorbance measured at 650 nm was used to construct the analytical curve.

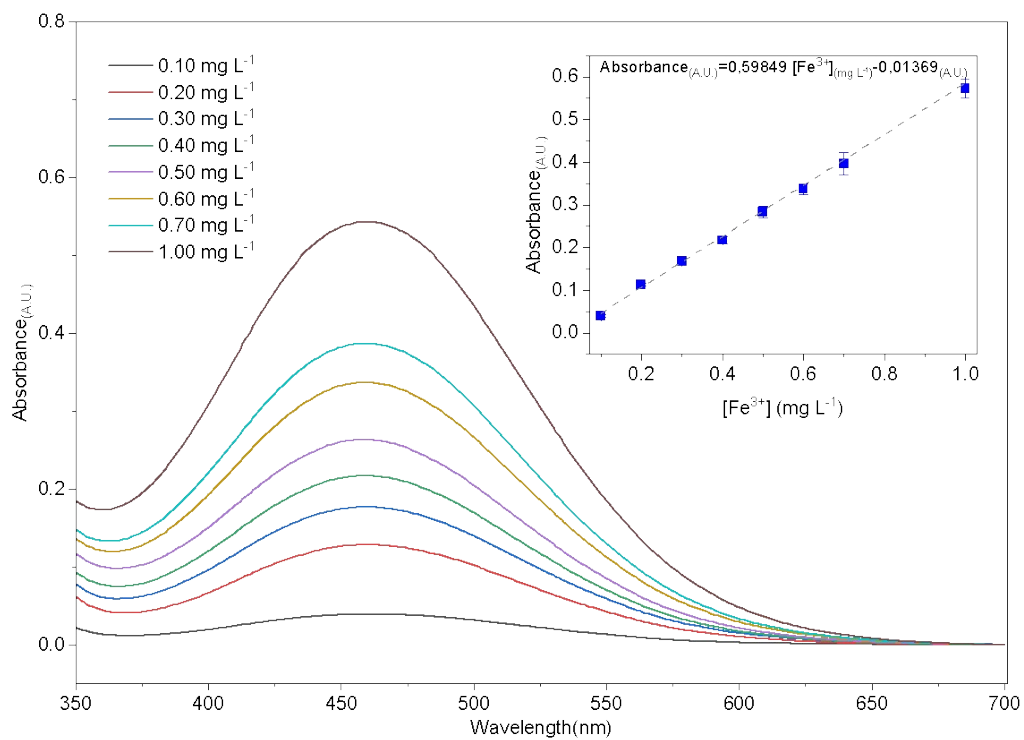

**Figure S5.** UV-Vis spectra and analytical curve obtained using UV-Vis spectrophotometric method and Fe<sup>3+</sup>-thiocyanate complex. The absorbance measured at 460 nm was used to construct the analytical curve.
